# Supplementary material for: Computational predictors fail to identify amino acid substitution effects at rheostat positions
Source: PubMed Central journal article supplement (PMC5278360; doi:10.1038/srep41329), 2017-01-30
Supplement: srep41329-s3.pdf [file srep41329-s3.pdf]

## Supporting online material for:

# Computational predictors fail to identify amino acid substitution effects at rheostat positions

Miller M, Bromberg Y and Swint-Kruse L

### Table of Contents for Supporting Online Material

**Table 1** – Experimentally-measured, quantitative variant outcomes generated for rheostat positions in dimeric LacI by the Swint-Kruse laboratory.

**Table 2** – Experimentally-measured, semi-quantitative outcomes for variants of tetrameric LacI generated by the Miller laboratory.

**Table 3** – Predictions for variants at rheostat positions.

**Table 4** – Predictions for variants at toggle positions.

**Table 5** – Correlation of repressor functional change and predicted variant-effect scores compared for *rheostat\_9* and *rheostat\_12* sets.

**Table 6** – Grouping of tetramer LacI phenotypes into functional outcomes used for this study.

**Table 7** – Comprehensive overview of the characteristics for variant-effect predictors.

**File 1** – Multiple sequence alignment of the LacI/GalR family.

**Figure 1** – Distributions of variant scores from continuous and binary prediction methods for the *stringent* set are different between rheostats and toggles.

**Figure 2** – Distributions of variant scores from continuous and binary prediction methods for the *complete* set are different between rheostats and toggles.

**Figure 3** – Distributions of variant scores from continuous and binary prediction methods for the *extended* set are different between rheostats and toggles.

**Figure 4** – Correlation between experimentally measured fold-changes and predicted variant-effect scores for rheostat variants.

**Figure 5** – Trends in distributions of variant scores do not change with altered neutrality threshold.

### Short description for additional Files in the Supporting Online Material

**Table 1** – Experimentally-measured, quantitative variant outcomes generated for rheostat positions in dimeric LacI by the Swint-Kruse laboratory. Activity of the  $\beta$ -galactosidase reporter gene (“Liquid culture Bgal”) was measured for *E. coli* that expressed variants of the lactose repressor protein (LacI)<sup>1</sup>. Amino acid substitutions were created at 12 non-conserved positions in dimeric LacI (“lac-11”) by site-directed mutagenesis at the codon of interest in a plasmid carrying the *lacI* gene. Reporter activity was determined in the absence (“-”) and presence of allosteric inducer (“+inducer”). The top row contains the value for wild-type dimeric LacI, which was used to calculate fold-change for all variants. Note that low activity and fold change values correspond to strong transcription repression, whereas high activity and fold change values correspond to weak repression.

**Table 2** – Experimentally-measured, semi-quantitative outcomes for variants of tetrameric LacI generated by the Miller laboratory. Activity of the  $\beta$ -galactosidase reporter gene was measured in *E. coli* strains co-expressing variants of tetrameric

LacI<sup>2</sup>. Mutations were generated by (i) changing the codon of interest in the *lacI* gene to the amber codon and (ii) using 12-13 *E. coli* amber-suppression strains to substitute the desired amino acid. These data were used in the current study to identify toggle positions in LacI, as indicated in the right-hand columns and as described in Methods of the main text. Abbreviations for repression phenotypes are as follows: +, repression > 200 fold relative to activity of the unrepressed reporter gene; + -, repression ranges [20,200] fold; - +, repression ranges [4,20] fold; -, repression < 4. Abbreviations for induction phenotypes are as follows: s, no induction; ws, weak induction; vws, very weak induction. Additional phenotypes: c, cold sensitive mutants; h, heat sensitive mutants; r, mutants with reverse induction profile.

**Table 3** – Variant-effect predictions for all LacI rheostat variants, raw and normalized scores. The first two columns of numbers contain the experimentally-determined fold change (with propagated error) for each of the variants.

**Table 4** – Variant-effect predictions for all LacI toggle variants, raw and normalized scores.

**Table 7** – Comprehensive overview of the characteristics for variant-effect predictors. Specific versions used to generate Supplementary Tables S5 and S6 are given, in addition to common characteristics of the various algorithms.

**File 1** – Multiple Sequence Alignment of LacI and 350 related sequences, manually curated by the Swint-Kruse lab<sup>3</sup>.

## Material

| Prediction Method | Pearson's <i>r</i><br><i>rheostat_9</i> | Pearson's <i>r</i><br><i>rheostat_12</i> |
|-------------------|-----------------------------------------|------------------------------------------|
| SNAP2             | 0.58                                    | 0.61                                     |
| PROVEAN           | 0.4                                     | 0.41                                     |
| PolyPhen-2        | 0.43                                    | 0.45                                     |
| MutPred2          | 0.17                                    | 0.32                                     |

**Table 5. Correlation of repressor functional change and predicted variant-effect scores compared for *rheostat\_9* and *rheostat\_12* sets.** The four methods exhibiting statistically-significant differentiation of rheostat neutrals from non-neutrals show the same trends for correlation of measured fold-changes and prediction scores within both *rheostat\_9* and *rheostat\_12* sets.

| Effect on function | Phenotypes in tetrameric LacI                                  |
|--------------------|----------------------------------------------------------------|
| Neutral            | + , +c, +h                                                     |
| Intermediate       | + ws, + vws, + -, + - h, + - ws, + - vws, - +, - + ws, - + vws |
| Severe             | -, - + s, +s, + - s                                            |

**Table 6. Grouping of tetramer LacI phenotypes into functional outcomes used for this study.** Abbreviations for repression phenotypes are as follows: +, repression > 200 fold relative to activity of the unrepressed reporter gene; + -, repression ranges [20,200] fold; - +, repression ranges [4,20] fold; -, repression < 4. Abbreviations for induction phenotypes are as follows: s, no induction; ws, weak induction; vws, very weak induction. Additional phenotypes: c, cold sensitive mutants; h, heat sensitive mutants; r, mutants with reverse induction profile.

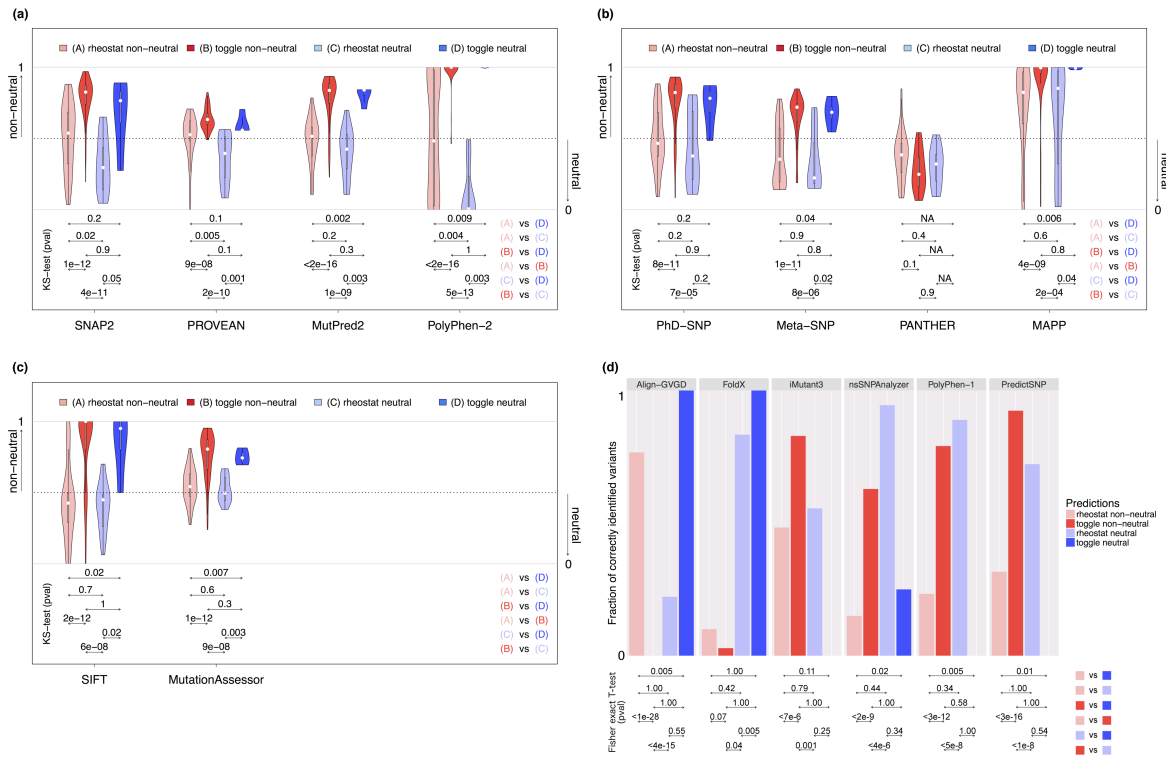

**Figure 1. Distributions of variant scores from continuous and binary prediction methods for the *stringent* set differ between rheostat and toggle positions.** Panels (a) to (c) show the distributions for continuous predictors, determined for neutral and non-neutral variants at both rheostat and toggle positions. The violin plot is an augmented box plot where the width at any given Y-axis value indicates the probability density of the data (median, *white circles*; interquartile range, *box outline*). The p-values below the plots are from a Kolmogorov-Smirnov (KS) test, indicating whether a method can significantly distinguish between the two distributions pointed to by the respective arrows. Panel (d) shows the fraction of correctly-predicted rheostat and toggle non-neutral and neutral variants for binary predictors. The p-values below the plot are from a Fisher exact T-test, indicating whether a method can significantly distinguish between the two distributions pointed to by the respective arrows.

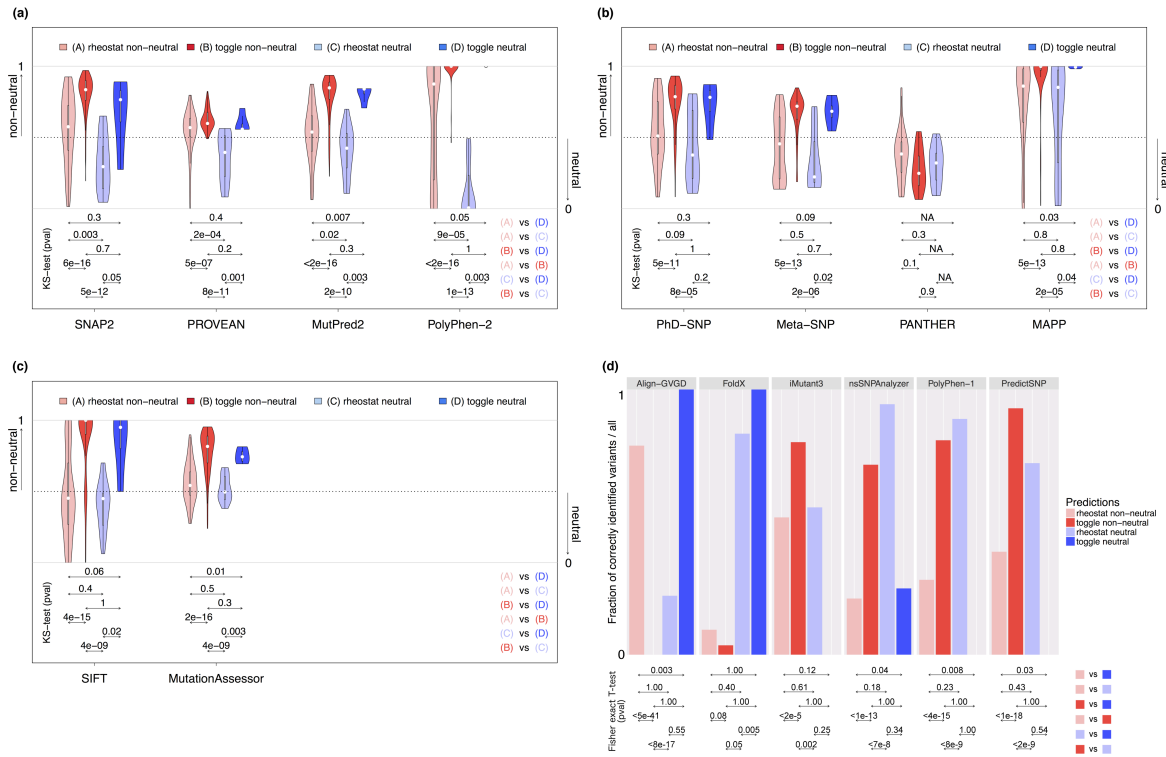

**Figure 2. Distributions of variant scores from continuous and binary prediction methods for the *complete* set differ between rheostat and toggle positions.** Panels (a) to (c) show the distributions for continuous predictors, determined for neutral and non-neutral variants at both rheostat and toggle positions. The p-values below the plots are from a Kolmogorov-Smirnov (KS) test, indicating whether a method can significantly distinguish between the two distributions pointed to by the respective arrows. Panel (d) shows the fraction of correctly-predicted rheostat and toggle non-neutral and neutral variants for binary predictors. The p-values below the plot are from a Fisher exact T-test, indicating whether a method can significantly distinguish between the two distributions pointed to by the respective arrows.

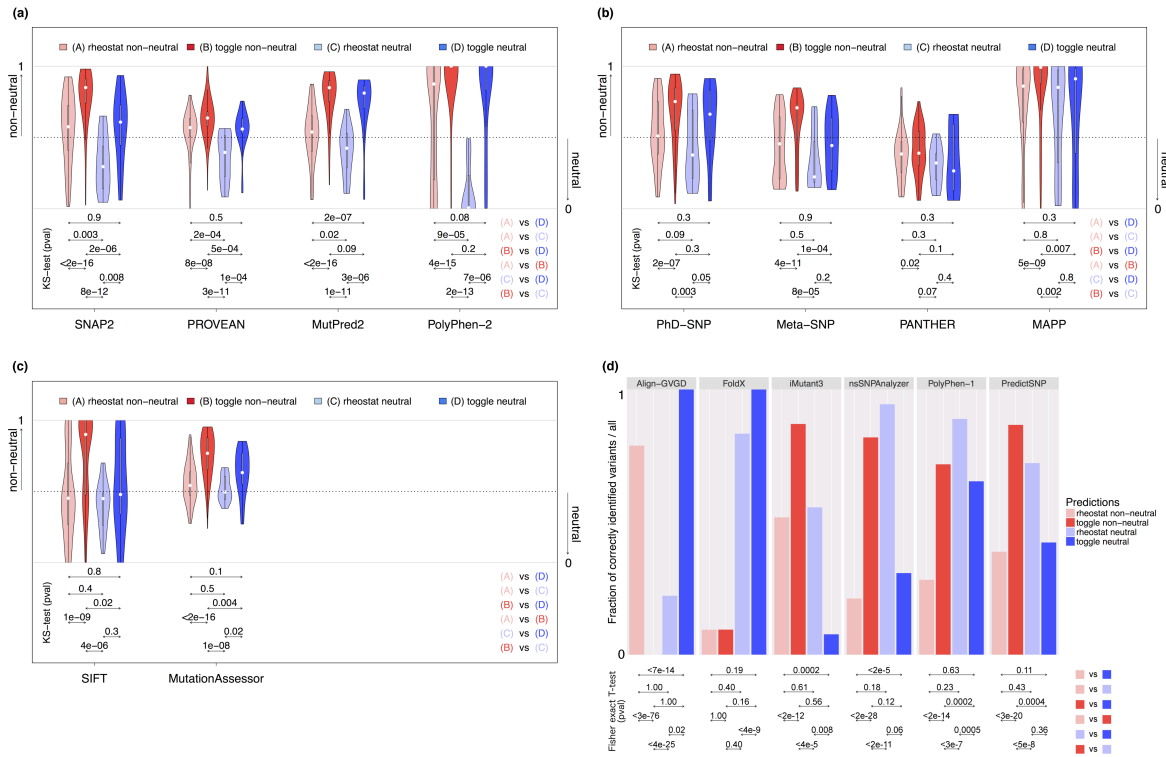

**Figure 3. Distributions of variant scores from continuous and binary prediction methods for the *extended* set differ between rheostat and toggle positions.** Panels (a) to (c) show the distributions for continuous predictors, determined for neutral and non-neutral variants at both rheostat and toggle positions. The p-values below the plots are from a Kolmogorov-Smirnov (KS) test, indicating whether a method can significantly distinguish between the two distributions pointed to by the respective arrows. Panel (d) shows the fraction of correctly-predicted rheostat and toggle non-neutral and neutral variants for binary predictors. The p-values below the plots are from a Fisher exact T-test, indicating whether a method can significantly distinguish between the two distributions pointed to by the respective arrows.

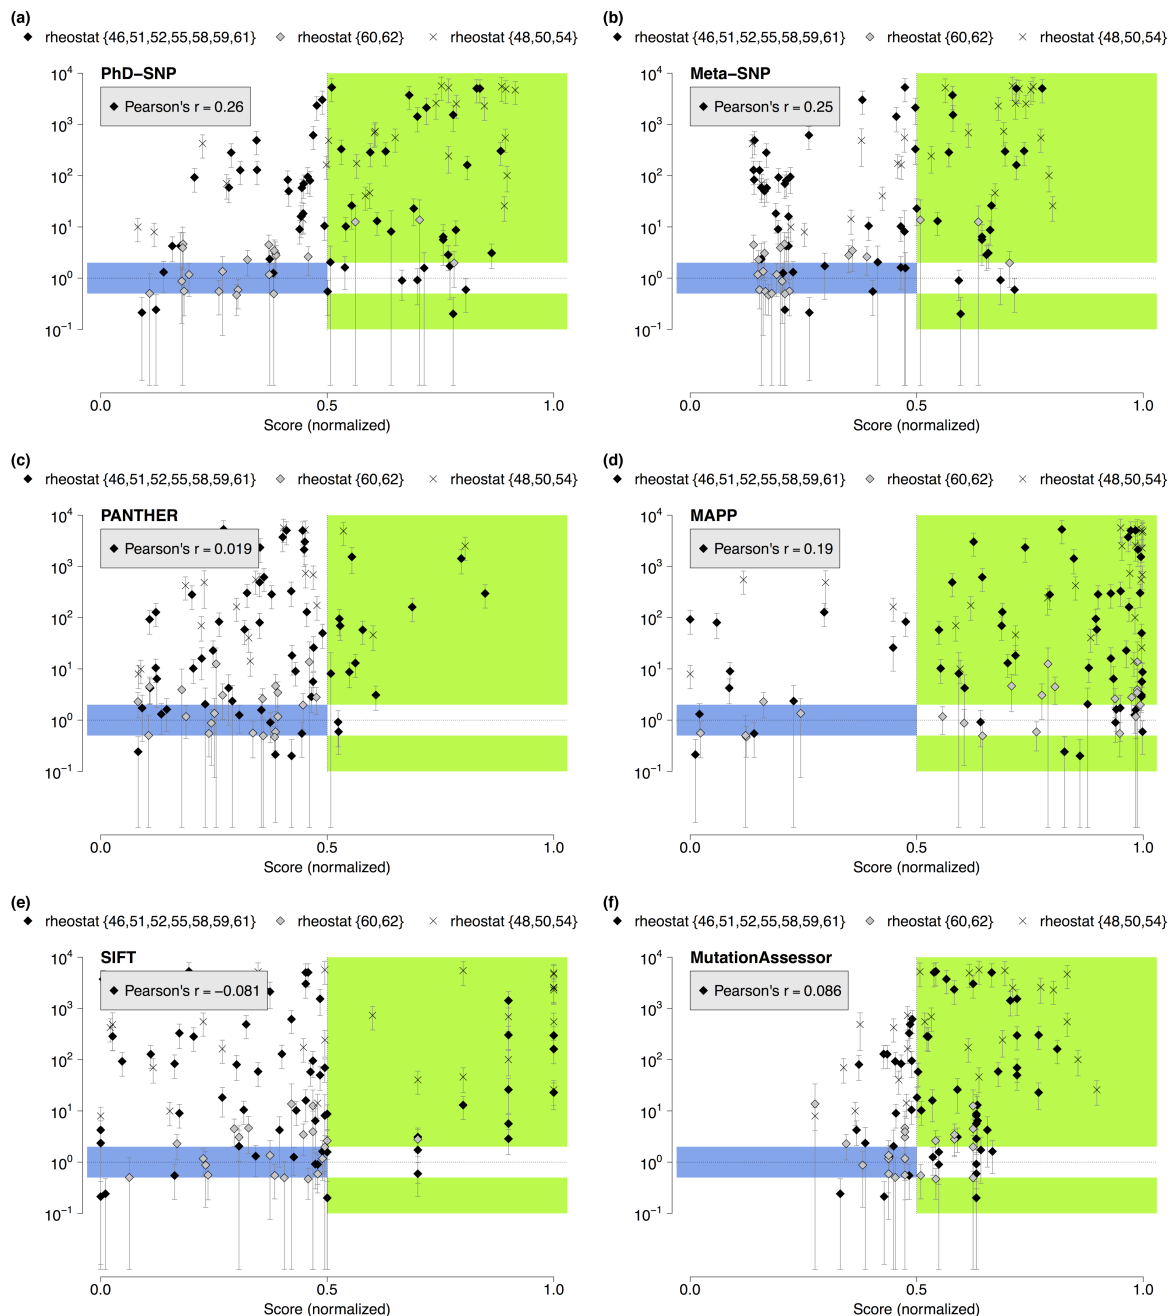

**Figure 4. Correlation between experimentally measured fold-changes and predicted variant-effect scores for rheostat variants.** Panels (a) to (f) show the relationship of the computationally and experimentally derived scores. For each variant at all rheostat positions, fold-change in repression relative to wild-type LacI is shown on log scale (Y axis), whereas predicted scores are normalized to the linear range [0,1] (X axis). The blue area depicts the scores expected for neutral variants (fold-change between 0.5 and 2.0); the green area depicts scores expected for non-neutral variants. The Pearson product-moment correlation coefficient (Pearson's  $r$ ) is given for the *rheostat\_9* set.



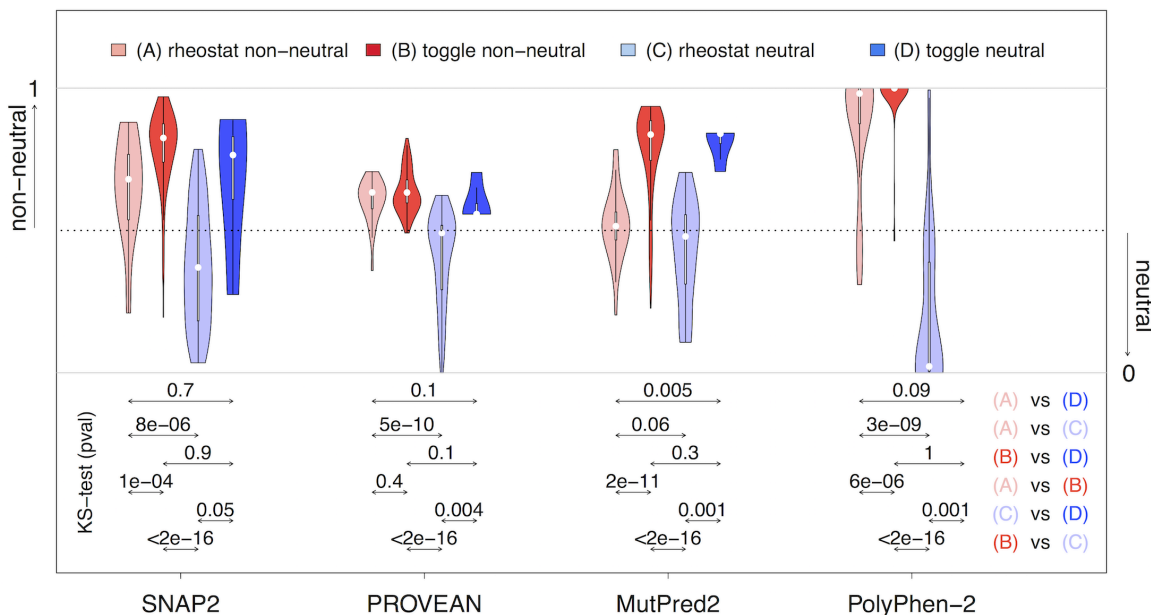

**Figure 5. Trends in distributions of variant scores do not change with altered neutrality threshold.** Shown is the distributions for continuous predictors using an extended neutrality threshold, determined for neutral and non-neutral variants at both rheostat and toggle positions for the *stringent* set. The p-values below the plots are from a Kolmogorov-Smirnov (KS) test, indicating whether a method can significantly distinguish between the two distributions pointed to by the respective arrows. The extended neutrality threshold derives from altering the default threshold (fold-change between 0.5 and 2.0) by factor 20 (fold-change between 0.05 and 40.0). The trends of experiment to prediction comparisons do not change with regards to the default threshold.

### References for Supporting Online Material

Table 1: <sup>1</sup>

Table 2: <sup>2</sup>

Table 3: 4, 5, 6, 7, 8, 9, 10, 11, 12, 13, 14, 15, 16, 17, 18

Table 4: 4, 5, 6, 7, 8, 9, 10, 11, 12, 13, 14, 15, 16, 17, 18

Table 5,6,7: none

File1: Manually-curated Multiple Sequence Alignment<sup>3</sup>

1. Meinhardt S, Manley MW, Jr., Parente DJ, Swint-Kruse L. Rheostats and toggle switches for modulating protein function. *PLoS One* **8**, e83502 (2013).
2. Suckow J, Markiewicz P, Kleina LG, Miller J, Kisters-Woike B, Muller-Hill B. Genetic studies of the Lac repressor. XV: 4000 single amino acid substitutions and analysis of the resulting phenotypes on the basis of the protein structure. *J Mol Biol* **261**, 509-523 (1996).
3. Tungtur S, Parente DJ, Swint-Kruse L. Functionally important positions can comprise the majority of a protein's architecture. *Proteins* **79**, 1589-1608 (2011).
4. Hecht M, Bromberg Y, Rost B. Better prediction of functional effects for sequence variants. *BMC Genomics* **16 Suppl 8**, S1 (2015).
5. Ng PC, Henikoff S. Predicting deleterious amino acid substitutions. *Genome Res* **11**, 863-874 (2001).
6. Choi Y, Sims GE, Murphy S, Miller JR, Chan AP. Predicting the functional effect of amino acid substitutions and indels. *PLoS One* **7**, e46688 (2012).
7. Tang H, Thomas PD. PANTHER-PSEP: predicting disease-causing genetic variants using position-specific evolutionary preservation. *Bioinformatics*, (2016).
8. Reva B, Antipin Y, Sander C. Predicting the functional impact of protein mutations: application to cancer genomics. *Nucleic Acids Res* **39**, e118 (2011).
9. Schymkowitz J, Borg J, Stricher F, Nys R, Rousseau F, Serrano L. The FoldX web server: an online force field. *Nucleic Acids Res* **33**, W382-388 (2005).

10. Mathe E, Olivier M, Kato S, Ishioka C, Hainaut P, Tavtigian SV. Computational approaches for predicting the biological effect of p53 missense mutations: a comparison of three sequence analysis based methods. *Nucleic Acids Res* **34**, 1317-1325 (2006).
11. Stone EA, Sidow A. Physicochemical constraint violation by missense substitutions mediates impairment of protein function and disease severity. *Genome Res* **15**, 978-986 (2005).
12. Ramensky V, Bork P, Sunyaev S. Human non-synonymous SNPs: server and survey. *Nucleic Acids Res* **30**, 3894-3900 (2002).
13. Capriotti E, Fariselli P, Calabrese R, Casadio R. Predicting protein stability changes from sequences using support vector machines. *Bioinformatics* **21 Suppl 2**, ii54-58 (2005).
14. Adzhubei IA, *et al.* A method and server for predicting damaging missense mutations. *Nat Methods* **7**, 248-249 (2010).
15. Bao L, Zhou M, Cui Y. nsSNPAnalyzer: identifying disease-associated nonsynonymous single nucleotide polymorphisms. *Nucleic Acids Res* **33**, W480-482 (2005).
16. Bendl J, *et al.* PredictSNP: robust and accurate consensus classifier for prediction of disease-related mutations. *PLoS Comput Biol* **10**, e1003440 (2014).
17. Capriotti E, Altman RB, Bromberg Y. Collective judgment predicts disease-associated single nucleotide variants. *BMC Genomics* **14 Suppl 3**, S2 (2013).
18. Capriotti E, Calabrese R, Casadio R. Predicting the insurgence of human genetic diseases associated to single point protein mutations with support vector machines and evolutionary information. *Bioinformatics* **22**, 2729-2734 (2006).
